# Supplementary material
Source: publisher figshare collection journal article supplement (https://gsajournals.figshare.com/ndownloader/files/27715584)
Supplement: Supplementary file 1 [file 27715584]

GO.ID	Term	Annotated	Significant	Expected	raw.p.value	Trait	pr
GO:0004424	imidazoleglycerol-phosphate dehydratase activity	4	3	0.22	0.00067	Al	MF
GO:0020037	heme binding	961	77	53.83	0.00104	Al	MF
GO:0019901	protein kinase binding	23	6	1.29	0.00135	Al	MF
GO:0047750	cholestenol delta-isomerase activity	5	3	0.28	0.00161	Al	MF
GO:0004650	polygalacturonase activity	45	8	2.52	0.00321	Al	MF
GO:0004012	phospholipid-translocating ATPase activity	20	5	1.12	0.00419	Al	MF
GO:0016747	transferase activity, transferring acyl groups other than amino-acyl groups	521	40	29.18	0.00451	Al	MF
GO:0008061	chitin binding	30	6	1.68	0.00569	Al	MF
GO:0008107	galactoside 2-alpha-L-fucosyltransferase activity	31	6	1.74	0.00673	Al	MF
GO:0050660	flavin adenine dinucleotide binding	206	20	11.54	0.00673	Al	MF
GO:0004602	glutathione peroxidase activity	15	4	0.84	0.00814	Al	MF
GO:0003676	nucleic acid binding	3951	237	221.31	0.00885	Al	MF
GO:0019211	phosphatase activator activity	3	2	0.17	0.00906	Al	MF
GO:0016174	NAD(P)H oxidase activity	3	2	0.17	0.00906	Al	MF
GO:0016757	transferase activity, transferring glycosyl groups	1084	81	60.72	0.01111	Al	MF
GO:0003824	catalytic activity	14558	900	815.43	0.01125	Al	MF
GO:0004190	aspartic-type endopeptidase activity	232	22	12.99	0.01132	Al	MF
GO:0032549	ribonucleoside binding	368	16	20.61	0.01320	Al	MF
GO:0031491	nucleosome binding	4	2	0.22	0.01744	Al	MF
GO:0004392	heme oxygenase (decyclizing) activity	4	2	0.22	0.01744	Al	MF
GO:0004185	serine-type carboxypeptidase activity	111	12	6.22	0.02164	Al	MF
GO:0050662	coenzyme binding	700	52	39.21	0.02214	Al	MF
GO:0047134	protein-disulfide reductase activity	20	4	1.12	0.02312	Al	MF
GO:0004619	phosphoglycerate mutase activity	12	3	0.67	0.02637	Al	MF
GO:0004197	cysteine-type endopeptidase activity	33	6	1.85	0.02755	Al	MF
GO:0004056	argininosuccinate lyase activity	5	2	0.28	0.02799	Al	MF
GO:0004066	asparagine synthase (glutamine-hydrolyzing) activity	6	2	0.34	0.04044	Al	MF
GO:0000079	regulation of cyclin-dependent protein serine/threonine kinase activity	23	6	1.32	0.0015	Al	BP
GO:0016125	sterol metabolic process	5	3	0.29	0.0017	Al	BP
GO:0015914	phospholipid transport	20	5	1.15	0.0047	Al	BP
GO:0055114	oxidation-reduction process	2527	177	145.33	0.0055	Al	BP
GO:0042546	cell wall biogenesis	51	8	2.93	0.0076	Al	BP
GO:0006508	proteolysis	1213	82	69.76	0.0140	Al	BP
GO:0006788	heme oxidation	4	2	0.23	0.0183	Al	BP
GO:0000105	histidine biosynthetic process	20	4	1.15	0.0252	Al	BP
GO:0006099	tricarboxylic acid cycle	20	4	1.15	0.0252	Al	BP
GO:0043044	ATP-dependent chromatin remodeling	5	2	0.29	0.0294	Al	BP
GO:0042256	mature ribosome assembly	5	2	0.29	0.0294	Al	BP
GO:0042450	arginine biosynthetic process via ornithine	5	2	0.29	0.0294	Al	BP
GO:0006811	ion transport	740	47	42.56	0.0388	Al	BP
GO:0006007	glucose catabolic process	6	2	0.35	0.0425	Al	BP
GO:0006529	asparagine biosynthetic process	6	2	0.35	0.0425	Al	BP
GO:0005615	extracellular space	43	7	1.58	0.00087	Ca	CC
GO:0015935	small ribosomal subunit	9	3	0.33	0.00351	Ca	CC
GO:0009538	photosystem I reaction center	10	3	0.37	0.00488	Ca	CC
GO:0005694	chromosome	184	9	6.77	0.00787	Ca	CC
GO:0005794	Golgi apparatus	80	3	2.94	0.04142	Ca	CC
GO:0030127	COPII vesicle coat	22	3	0.81	0.04528	Ca	CC
GO:0030014	CCR4-NOT complex	10	2	0.37	0.04997	Ca	CC
GO:0004869	cysteine-type endopeptidase inhibitor activity	39	7	1.78	0.0017	Ca	MF
GO:0003856	3-dehydroquinate synthase activity	3	2	0.14	0.0060	Ca	MF
GO:0016758	transferase activity, transferring hexosyl groups	892	52	40.68	0.0073	Ca	MF
GO:0008234	cysteine-type peptidase activity	358	27	16.33	0.0090	Ca	MF
GO:0008080	N-acetyltransferase activity	92	10	4.2	0.0091	Ca	MF
GO:0008271	secondary active sulfate transmembrane transporter activity	19	4	0.87	0.0096	Ca	MF
GO:0003917	DNA topoisomerase type I activity	11	3	0.5	0.0119	Ca	MF
GO:0043531	ADP binding	788	50	35.94	0.0121	Ca	MF
GO:0048038	quinone binding	31	5	1.41	0.0124	Ca	MF
GO:0004347	glucose-6-phosphate isomerase activity	5	2	0.23	0.0190	Ca	MF
GO:0004499	N,N-dimethylaniline monooxygenase activity	39	5	1.78	0.0312	Ca	MF
GO:0004834	tryptophan synthase activity	16	3	0.73	0.0340	Ca	MF
GO:0051536	iron-sulfur cluster binding	134	11	6.11	0.0356	Ca	MF
GO:0004348	glucosylceramidase activity	8	2	0.36	0.0485	Ca	MF
GO:0008152	metabolic process	15566	728	696.36	0.00038	Ca	BP
GO:0032259	methylation	82	7	3.67	0.00421	Ca	BP
GO:0045039	protein import into mitochondrial inner membrane	3	2	0.13	0.00582	Ca	BP
GO:0043419	urea catabolic process	3	2	0.13	0.00582	Ca	BP
GO:0008272	sulfate transport	19	4	0.85	0.00900	Ca	BP
GO:0048544	recognition of pollen	189	16	8.46	0.01098	Ca	BP
GO:0006308	DNA catabolic process	19	4	0.85	0.01447	Ca	BP
GO:0006644	phospholipid metabolic process	127	6	5.68	0.03624	Ca	BP
GO:0006662	glycerol ether metabolic process	70	7	3.13	0.03659	Ca	BP
GO:0006265	DNA topological change	30	4	1.34	0.04328	Ca	BP
GO:0030036	actin cytoskeleton organization	64	6	2.86	0.04663	Ca	BP
GO:0005853	eukaryotic translation elongation factor 1 complex	6	2	0.12	0.0055	Cd	CC
GO:0031225	anchored component of membrane	22	3	0.43	0.0087	Cd	CC
GO:0005681	spliceosomal complex	36	3	0.71	0.0331	Cd	CC
GO:0000221	vacuolar proton-transporting V-type ATPase, V1 domain	2	1	0.04	0.0390	Cd	CC
GO:0016035	zeta DNA polymerase complex	2	1	0.04	0.0390	Cd	CC
GO:0004601	peroxidase activity	339	15	5.89	0.00095	Cd	MF
GO:0004134	4-alpha-glucanotransferase activity	4	2	0.07	0.00176	Cd	MF
GO:0020037	heme binding	961	29	16.69	0.00304	Cd	MF
GO:0016161	beta-amylase activity	19	3	0.33	0.00410	Cd	MF
GO:0004452	isopentenyl-diphosphate delta-isomerase activity	6	2	0.1	0.00431	Cd	MF
GO:0046872	metal ion binding	3541	66	61.49	0.00578	Cd	MF
GO:0005337	nucleoside transmembrane transporter activity	7	2	0.12	0.00596	Cd	MF
GO:0003746	translation elongation factor activity	26	3	0.45	0.01006	Cd	MF
GO:0022857	transmembrane transporter activity	1059	26	18.39	0.01085	Cd	MF
GO:0043022	ribosome binding	11	2	0.19	0.01492	Cd	MF
GO:0016760	cellulose synthase (UDP-forming) activity	32	3	0.56	0.01777	Cd	MF
GO:0005096	GTPase activator activity	36	3	0.63	0.02432	Cd	MF
GO:0008131	primary amine oxidase activity	15	2	0.26	0.02721	Cd	MF
GO:0003676	nucleic acid binding	3951	81	68.61	0.02929	Cd	MF
GO:0004020	adenylylsulfate kinase activity	2	1	0.03	0.03443	Cd	MF
GO:0016149	translation release factor activity, codon specific	18	2	0.31	0.03833	Cd	MF
GO:0033897	ribonuclease T2 activity	19	2	0.33	0.04235	Cd	MF
GO:0016818	hydrolase activity, acting on acid anhydrides, in phosphorus-containing anhydrides	974	19	16.91	0.04645	Cd	MF
GO:0006979	response to oxidative stress	336	15	6.33	0.0019	Cd	BP
GO:0010215	cellulose microfibril organization	18	3	0.34	0.0044	Cd	BP
GO:0000272	polysaccharide catabolic process	19	3	0.36	0.0051	Cd	BP
GO:0007165	signal transduction	426	13	8.02	0.0064	Cd	BP
GO:0016049	cell growth	22	3	0.41	0.0078	Cd	BP
GO:0009765	photosynthesis, light harvesting	32	3	0.6	0.0220	Cd	BP
GO:0030244	cellulose biosynthetic process	38	3	0.72	0.0344	Cd	BP
GO:0019985	translesion synthesis	2	1	0.04	0.0373	Cd	BP
GO:0043461	proton-transporting ATP synthase complex assembly	2	1	0.04	0.0373	Cd	BP
GO:0000103	sulfate assimilation	2	1	0.04	0.0373	Cd	BP
GO:0009341	beta-galactosidase complex	7	2	0.33	0.041	Cu	CC
GO:0004834	tryptophan synthase activity	16	5	0.7	0.00045	Cu	MF
GO:0003700	DNA-binding transcription factor activity	1054	69	45.85	0.00051	Cu	MF
GO:0004334	fumarylacetoacetase activity	6	3	0.26	0.00149	Cu	MF
GO:0016491	oxidoreductase activity	3000	144	130.52	0.00196	Cu	MF
GO:0016844	strictosidine synthase activity	44	7	1.91	0.00271	Cu	MF
GO:0017150	tRNA dihydrouridine synthase activity	8	3	0.35	0.00390	Cu	MF
GO:0016992	lipoate synthase activity	11	3	0.48	0.01042	Cu	MF
GO:0047617	acyl-CoA hydrolase activity	4	2	0.17	0.01070	Cu	MF
GO:0016151	nickel cation binding	12	3	0.52	0.01345	Cu	MF
GO:0004061	arylformamidase activity	5	2	0.22	0.01732	Cu	MF
GO:0008378	galactosyltransferase activity	62	7	2.7	0.01777	Cu	MF
GO:0008171	O-methyltransferase activity	83	9	3.61	0.01855	Cu	MF
GO:0004568	chitinase activity	37	5	1.61	0.02121	Cu	MF
GO:0005509	calcium ion binding	245	18	10.66	0.02163	Cu	MF
GO:0008253	5'-nucleotidase activity	6	2	0.26	0.02524	Cu	MF
GO:0004970	ionotropic glutamate receptor activity	41	5	1.78	0.03166	Cu	MF
GO:0004427	inorganic diphosphatase activity	28	4	1.22	0.03177	Cu	MF
GO:0008113	peptide-methionine (S)-S-oxide reductase activity	7	2	0.3	0.03433	Cu	MF
GO:0004565	beta-galactosidase activity	7	2	0.3	0.03433	Cu	MF
GO:0004222	metalloendopeptidase activity	58	6	2.52	0.03968	Cu	MF
GO:0010181	FMN binding	44	5	1.91	0.04130	Cu	MF
GO:0043047	single-stranded telomeric DNA binding	1	1	0.04	0.04351	Cu	MF
GO:0004077	biotin-[acetyl-CoA-carboxylase] ligase activity	1	1	0.04	0.04351	Cu	MF
GO:0009072	aromatic amino acid family metabolic process	99	14	4.65	0.00049	Cu	BP
GO:0006355	regulation of transcription, DNA-templated	2228	133	104.73	0.00152	Cu	BP
GO:0006568	tryptophan metabolic process	25	7	1.18	0.00193	Cu	BP
GO:0010411	xyloglucan metabolic process	3	2	0.14	0.00642	Cu	BP
GO:0009264	deoxyribonucleotide catabolic process	4	2	0.19	0.01243	Cu	BP
GO:0043161	proteasome-mediated ubiquitin-dependent protein catabolic process	13	4	0.61	0.01283	Cu	BP
GO:0009107	lipoate biosynthetic process	11	3	0.52	0.01287	Cu	BP
GO:0019441	tryptophan catabolic process to kynurenine	5	2	0.24	0.02008	Cu	BP
GO:0007010	cytoskeleton organization	154	8	7.24	0.02120	Cu	BP
GO:0032502	developmental process	182	8	8.56	0.02463	Cu	BP
GO:0006032	chitin catabolic process	37	5	1.74	0.02844	Cu	BP
GO:0006486	protein glycosylation	105	11	4.94	0.03043	Cu	BP
GO:0016998	cell wall macromolecule catabolic process	41	5	1.93	0.04200	Cu	BP
GO:0048046	apoplast	64	5	1.03	0.0035	Fe	CC
GO:0005618	cell wall	143	7	2.29	0.0079	Fe	CC
GO:0005786	signal recognition particle, endoplasmic reticulum targeting	2	1	0.03	0.0318	Fe	CC
GO:0044599	AP-5 adaptor complex	2	1	0.03	0.0318	Fe	CC
GO:0009916	alternative oxidase activity	11	3	0.16	0.00048	Fe	MF
GO:0016747	transferase activity, transferring acyl groups other than amino-acyl groups	521	18	7.69	0.00067	Fe	MF
GO:0003690	double-stranded DNA binding	112	7	1.65	0.00139	Fe	MF
GO:0016762	xyloglucan:xyloglucosyl transferase activity	64	5	0.94	0.00255	Fe	MF
GO:0009378	four-way junction helicase activity	54	4	0.8	0.00826	Fe	MF
GO:0005216	ion channel activity	117	7	1.73	0.01932	Fe	MF
GO:0004602	glutathione peroxidase activity	15	2	0.22	0.02009	Fe	MF
GO:0004970	ionotropic glutamate receptor activity	41	3	0.6	0.02247	Fe	MF
GO:0017070	U6 snRNA binding	2	1	0.03	0.02929	Fe	MF
GO:0030942	endoplasmic reticulum signal peptide binding	2	1	0.03	0.02929	Fe	MF
GO:0016730	oxidoreductase activity, acting on iron-sulfur proteins as donors	2	1	0.03	0.02929	Fe	MF
GO:0032542	sulfiredoxin activity	2	1	0.03	0.02929	Fe	MF
GO:0030623	U5 snRNA binding	2	1	0.03	0.02929	Fe	MF
GO:0004671	protein C-terminal S-isoprenylcysteine carboxyl O-methyltransferase activity	2	1	0.03	0.02929	Fe	MF
GO:0016818	hydrolase activity, acting on acid anhydrides, in phosphorus-containing anhydrides	974	17	14.37	0.03448	Fe	MF
GO:0008312	7S RNA binding	21	2	0.31	0.03791	Fe	MF
GO:0008324	cation transmembrane transporter activity	366	6	5.4	0.03985	Fe	MF
GO:0034061	DNA polymerase activity	33	2	0.49	0.04356	Fe	MF
GO:0008649	rRNA methyltransferase activity	3	1	0.04	0.04362	Fe	MF
GO:0004527	exonuclease activity	87	3	1.28	0.04480	Fe	MF
GO:0019901	protein kinase binding	23	2	0.34	0.04481	Fe	MF
GO:0048544	recognition of pollen	189	9	2.74	0.0018	Fe	BP
GO:0006073	cellular glucan metabolic process	127	7	1.84	0.0023	Fe	BP
GO:0006633	fatty acid biosynthetic process	177	8	2.56	0.0044	Fe	BP
GO:0006310	DNA recombination	87	5	1.26	0.0087	Fe	BP
GO:0000045	autophagosome assembly	12	2	0.17	0.0125	Fe	BP
GO:0006890	retrograde vesicle-mediated transport, Golgi to ER	13	2	0.19	0.0147	Fe	BP
GO:0006811	ion transport	740	12	10.72	0.0260	Fe	BP
GO:0000055	ribosomal large subunit export from nucleus	2	1	0.03	0.0288	Fe	BP
GO:0045900	negative regulation of translational elongation	2	1	0.03	0.0288	Fe	BP
GO:0042273	ribosomal large subunit biogenesis	2	1	0.03	0.0288	Fe	BP
GO:0006481	C-terminal protein methylation	2	1	0.03	0.0288	Fe	BP
GO:0009733	response to auxin	125	5	1.81	0.0356	Fe	BP
GO:0010411	xyloglucan metabolic process	3	1	0.04	0.0428	Fe	BP
GO:0007010	cytoskeleton organization	154	4	2.23	0.0433	Fe	BP
GO:0000079	regulation of cyclin-dependent protein serine/threonine kinase activity	23	2	0.33	0.0433	Fe	BP
GO:0005615	extracellular space	43	8	2.62	0.0039	K	CC
GO:0005834	heterotrimeric G-protein complex	10	3	0.61	0.0196	K	CC
GO:0000015	phosphopyruvate hydratase complex	12	3	0.73	0.0328	K	CC
GO:0016705	oxidoreductase activity, acting on paired donors, with incorporation or reduction of molecular oxygen	697	65	42.83	0.00023	K	MF
GO:0004197	cysteine-type endopeptidase activity	33	9	2.03	0.00044	K	MF
GO:0020037	heme binding	961	84	59.05	0.00073	K	MF
GO:0005506	iron ion binding	699	63	42.95	0.00155	K	MF
GO:0004334	fumarylacetoacetase activity	6	3	0.37	0.00402	K	MF
GO:0004176	ATP-dependent peptidase activity	20	5	1.23	0.00621	K	MF
GO:0008146	sulfotransferase activity	13	4	0.8	0.00649	K	MF
GO:0004842	ubiquitin-protein transferase activity	233	25	14.32	0.00755	K	MF
GO:0003856	3-dehydroquinate synthase activity	3	2	0.18	0.01086	K	MF
GO:0050080	malonyl-CoA decarboxylase activity	3	2	0.18	0.01086	K	MF
GO:0004970	ionotropic glutamate receptor activity	41	7	2.52	0.01167	K	MF
GO:0004579	dolichyl-diphosphooligosaccharide-protein glycotransferase activity	9	3	0.55	0.01470	K	MF
GO:0005509	calcium ion binding	245	24	15.06	0.01650	K	MF
GO:0004329	formate-tetrahydrofolate ligase activity	4	2	0.25	0.02083	K	MF
GO:0003879	ATP phosphoribosyltransferase activity	4	2	0.25	0.02083	K	MF
GO:0016209	antioxidant activity	364	32	22.37	0.02144	K	MF
GO:0003917	DNA topoisomerase type I activity	11	3	0.68	0.02634	K	MF
GO:0004869	cysteine-type endopeptidase inhibitor activity	39	6	2.4	0.03049	K	MF
GO:0004347	glucose-6-phosphate isomerase activity	5	2	0.31	0.03332	K	MF
GO:0004056	argininosuccinate lyase activity	5	2	0.31	0.03332	K	MF
GO:0031369	translation initiation factor binding	12	3	0.74	0.03355	K	MF
GO:0004634	phosphopyruvate hydratase activity	12	3	0.74	0.03355	K	MF
GO:0005544	calcium-dependent phospholipid binding	22	4	1.35	0.04280	K	MF
GO:0003854	3-beta-hydroxy-delta5-steroid dehydrogenase activity	54	7	3.32	0.04636	K	MF
GO:0009378	four-way junction helicase activity	54	7	3.32	0.04636	K	MF
GO:0005542	folic acid binding	6	2	0.37	0.04796	K	MF
GO:0006694	steroid biosynthetic process	63	11	3.9	0.0015	K	BP
GO:0007186	G protein-coupled receptor signaling pathway	42	7	2.6	0.0023	K	BP
GO:0043419	urea catabolic process	3	2	0.19	0.0110	K	BP
GO:0016567	protein ubiquitination	212	22	13.12	0.0122	K	BP
GO:0055114	oxidation-reduction process	2527	182	156.43	0.0189	K	BP
GO:0048513	animal organ development	4	2	0.25	0.0211	K	BP
GO:0006281	DNA repair	376	32	23.28	0.0298	K	BP
GO:0042450	arginine biosynthetic process via ornithine	5	2	0.31	0.0338	K	BP
GO:0030014	CCR4-NOT complex	10	5	0.93	0.0012	Mg	CC
GO:0005739	mitochondrion	230	32	21.46	0.0029	Mg	CC
GO:0030246	carbohydrate binding	405	55	33.92	0.00061	Mg	MF
GO:0003690	double-stranded DNA binding	112	19	9.38	0.00235	Mg	MF
GO:0016760	cellulose synthase (UDP-forming) activity	32	8	2.68	0.00405	Mg	MF
GO:0004452	isopentenyl-diphosphate delta-isomerase activity	6	3	0.5	0.00967	Mg	MF
GO:0016747	transferase activity, transferring acyl groups other than amino-acyl groups	521	60	43.63	0.01307	Mg	MF
GO:0005337	nucleoside transmembrane transporter activity	7	3	0.59	0.01587	Mg	MF
GO:0033897	ribonuclease T2 activity	19	5	1.59	0.01763	Mg	MF
GO:0008108	UDP-glucose:hexose-1-phosphate uridylyltransferase activity	3	2	0.25	0.01986	Mg	MF
GO:0008565	protein transporter activity	53	10	4.44	0.02457	Mg	MF
GO:0004672	protein kinase activity	2724	254	228.13	0.02819	Mg	MF
GO:0008233	peptidase activity	1125	84	94.22	0.03134	Mg	MF
GO:0003887	DNA-directed DNA polymerase activity	30	6	2.51	0.03553	Mg	MF
GO:0016888	endodeoxyribonuclease activity, producing 5'-phosphomonoesters	6	3	0.5	0.03749	Mg	MF
GO:0047617	acyl-CoA hydrolase activity	4	2	0.33	0.03752	Mg	MF
GO:0008124	4-alpha-hydroxytetrahydrobiopterin dehydratase activity	4	2	0.33	0.03752	Mg	MF
GO:0004827	proline-tRNA ligase activity	4	2	0.33	0.03752	Mg	MF
GO:0003938	IMP dehydrogenase activity	4	2	0.33	0.03752	Mg	MF
GO:0009055	electron transfer activity	330	38	27.64	0.03918	Mg	MF
GO:0008107	galactoside 2-alpha-L-fucosyltransferase activity	31	6	2.6	0.04104	Mg	MF
GO:0005094	Rho GDP-dissociation inhibitor activity	10	3	0.84	0.04502	Mg	MF
GO:0006402	mRNA catabolic process	20	6	1.73	0.0055	Mg	BP
GO:0015031	protein transport	348	37	30.06	0.0082	Mg	BP
GO:0030244	cellulose biosynthetic process	38	8	3.28	0.0143	Mg	BP
GO:0008299	isoprenoid biosynthetic process	72	12	6.22	0.0161	Mg	BP
GO:0048278	vesicle docking	25	4	2.16	0.0211	Mg	BP
GO:0000244	spliceosomal tri-snRNP complex assembly	3	2	0.26	0.0211	Mg	BP
GO:0006729	tetrahydrobiopterin biosynthetic process	4	2	0.35	0.0398	Mg	BP
GO:0006433	prolyl-tRNA aminoacylation	4	2	0.35	0.0398	Mg	BP
GO:0006465	signal peptide processing	16	4	1.38	0.0435	Mg	BP
GO:0006139	nucleobase-containing compound metabolic process	4065	376	351.18	0.0442	Mg	BP
GO:0042546	cell wall biogenesis	51	9	4.41	0.0465	Mg	BP
GO:0046907	intracellular transport	317	30	27.39	0.0487	Mg	BP
GO:0005739	mitochondrion	230	21	10.08	0.00098	Mn	CC
GO:0000786	nucleosome	77	9	3.38	0.00622	Mn	CC
GO:0009538	photosystem I reaction center	10	3	0.44	0.00795	Mn	CC
GO:0030014	CCR4-NOT complex	10	3	0.44	0.00795	Mn	CC
GO:0003690	double-stranded DNA binding	112	14	4.72	0.00031	Mn	MF
GO:0016756	glutathione gamma-glutamylcysteinyltransferase activity	5	3	0.21	0.00070	Mn	MF
GO:0004519	endonuclease activity	80	8	3.37	0.00114	Mn	MF
GO:0043565	sequence-specific DNA binding	570	40	24.01	0.00197	Mn	MF
GO:0004834	tryptophan synthase activity	16	4	0.67	0.00380	Mn	MF
GO:0003700	DNA-binding transcription factor activity	1054	62	44.4	0.00527	Mn	MF
GO:0003938	IMP dehydrogenase activity	4	2	0.17	0.01005	Mn	MF
GO:0009055	electron transfer activity	330	23	13.9	0.01199	Mn	MF
GO:0004672	protein kinase activity	2724	139	114.76	0.01625	Mn	MF
GO:0004045	aminoacyl-tRNA hydrolase activity	14	3	0.59	0.01916	Mn	MF
GO:0016757	transferase activity, transferring glycosyl groups	1084	61	45.67	0.02231	Mn	MF
GO:0008375	acetylglucosaminyltransferase activity	91	9	3.83	0.02351	Mn	MF
GO:0003924	GTPase activity	86	8	3.62	0.02846	Mn	MF
GO:0030247	polysaccharide binding	207	15	8.72	0.02951	Mn	MF
GO:0030955	potassium ion binding	31	4	1.31	0.03993	Mn	MF
GO:0004743	pyruvate kinase activity	31	4	1.31	0.03993	Mn	MF
GO:0004650	polygalacturonase activity	45	5	1.9	0.03996	Mn	MF
GO:0004144	diacylglycerol O-acyltransferase activity	8	2	0.34	0.04193	Mn	MF
GO:0004751	ribose-5-phosphate isomerase activity	8	2	0.34	0.04193	Mn	MF
GO:0051536	iron-sulfur cluster binding	134	10	5.65	0.04239	Mn	MF
GO:0030246	carbohydrate binding	405	30	17.06	0.04449	Mn	MF
GO:0003735	structural constituent of ribosome	616	35	25.95	0.04610	Mn	MF
GO:0008483	transaminase activity	33	4	1.39	0.04864	Mn	MF
GO:0046938	phytochelatin biosynthetic process	5	3	0.22	0.00074	Mn	BP
GO:0006308	DNA catabolic process	19	5	0.82	0.00127	Mn	BP
GO:0010038	response to metal ion	8	3	0.34	0.00378	Mn	BP
GO:0006402	mRNA catabolic process	20	4	0.86	0.00950	Mn	BP
GO:0015979	photosynthesis	154	12	6.62	0.00952	Mn	BP
GO:0006659	phosphatidylserine biosynthetic process	4	2	0.17	0.01047	Mn	BP
GO:0006468	protein phosphorylation	2726	140	117.27	0.01800	Mn	BP
GO:0006568	tryptophan metabolic process	25	4	1.08	0.02093	Mn	BP
GO:0006302	double-strand break repair	18	5	0.77	0.02457	Mn	BP
GO:0031167	rRNA methylation	6	2	0.26	0.02470	Mn	BP
GO:0006096	glycolytic process	103	9	4.43	0.03337	Mn	BP
GO:0045017	glycerolipid biosynthetic process	41	4	1.76	0.03357	Mn	BP
GO:0032784	regulation of DNA-templated transcription, elongation	7	2	0.3	0.03361	Mn	BP
GO:0009052	pentose-phosphate shunt, non-oxidative branch	8	2	0.34	0.04356	Mn	BP
GO:0000724	double-strand break repair via homologous recombination	8	2	0.34	0.04356	Mn	BP
GO:0030036	actin cytoskeleton organization	64	3	2.75	0.04369	Mn	BP
GO:0016020	membrane	3628	107	96.84	0.0078	Mo	CC
GO:0005674	transcription factor TFIIF complex	6	2	0.16	0.0099	Mo	CC
GO:0000275	mitochondrial proton-transporting ATP synthase complex, catalytic core F(1)	8	2	0.21	0.0179	Mo	CC
GO:0016459	myosin complex	27	3	0.72	0.0342	Mo	CC
GO:0000178	exosome (RNase complex)	12	2	0.32	0.0392	Mo	CC
GO:0004396	hexokinase activity	15	4	0.37	0.00042	Mo	MF
GO:0005536	glucose binding	15	4	0.37	0.00042	Mo	MF
GO:0004089	carbonate dehydratase activity	8	3	0.2	0.00079	Mo	MF
GO:0016705	oxidoreductase activity, acting on paired donors, with incorporation or reduction of molecular oxygen	697	32	17.39	0.00118	Mo	MF
GO:0005524	ATP binding	3104	102	77.42	0.00225	Mo	MF
GO:0016887	ATPase activity	478	21	11.92	0.00472	Mo	MF
GO:0015238	drug transmembrane transporter activity	115	9	2.87	0.00507	Mo	MF
GO:0008408	3'-5' exonuclease activity	64	6	1.6	0.00518	Mo	MF
GO:0004471	malate dehydrogenase (decarboxylating) (NAD+) activity	15	3	0.37	0.00562	Mo	MF
GO:0003910	DNA ligase (ATP) activity	6	2	0.15	0.00872	Mo	MF
GO:0004144	diacylglycerol O-acyltransferase activity	8	2	0.2	0.01574	Mo	MF
GO:0015098	molybdate ion transmembrane transporter activity	9	2	0.22	0.01991	Mo	MF
GO:0003883	CTP synthase activity	10	2	0.25	0.02448	Mo	MF
GO:0020037	heme binding	961	34	23.97	0.02693	Mo	MF
GO:0008236	serine-type peptidase activity	347	9	8.66	0.02772	Mo	MF
GO:0003774	motor activity	145	7	3.62	0.02886	Mo	MF
GO:0005525	GTP binding	351	15	8.75	0.03131	Mo	MF
GO:0003735	structural constituent of ribosome	616	23	15.36	0.03710	Mo	MF
GO:0008168	methyltransferase activity	435	16	10.85	0.03945	Mo	MF
GO:0015297	antiporter activity	170	9	4.24	0.04344	Mo	MF
GO:0004375	glycine dehydrogenase (decarboxylating) activity	2	1	0.05	0.04926	Mo	MF
GO:0004379	glycylpeptide N-tetradecanoyltransferase activity	2	1	0.05	0.04926	Mo	MF
GO:0004151	dihydroorotase activity	2	1	0.05	0.04926	Mo	MF
GO:0003980	UDP-glucose:glycoprotein glucosyltransferase activity	2	1	0.05	0.04926	Mo	MF
GO:0004174	electron-transferring-flavoprotein dehydrogenase activity	2	1	0.05	0.04926	Mo	MF
GO:0004126	cytidine deaminase activity	2	1	0.05	0.04926	Mo	MF
GO:0008915	lipid-A-disaccharide synthase activity	2	1	0.05	0.04926	Mo	MF
GO:0008531	riboflavin kinase activity	2	1	0.05	0.04926	Mo	MF
GO:0008883	glutamyl-tRNA reductase activity	2	1	0.05	0.04926	Mo	MF
GO:0008022	protein C-terminus binding	2	1	0.05	0.04926	Mo	MF
GO:0004831	tyrosine-tRNA ligase activity	2	1	0.05	0.04926	Mo	MF
GO:0001678	cellular glucose homeostasis	15	4	0.37	0.00039	Mo	BP
GO:0046835	carbohydrate phosphorylation	15	4	0.37	0.00039	Mo	BP
GO:0048544	recognition of pollen	189	12	4.64	0.00252	Mo	BP
GO:0006367	transcription initiation from RNA polymerase II promoter	26	4	0.64	0.00349	Mo	BP
GO:0006855	drug transmembrane transport	106	8	2.6	0.00460	Mo	BP
GO:0006897	endocytosis	5	2	0.12	0.00572	Mo	BP
GO:0006139	nucleobase-containing compound metabolic process	4065	92	99.75	0.01757	Mo	BP
GO:0015689	molybdate ion transport	9	2	0.22	0.01930	Mo	BP
GO:0006310	DNA recombination	87	6	2.13	0.02014	Mo	BP
GO:0030150	protein import into mitochondrial matrix	10	2	0.25	0.02374	Mo	BP
GO:0008152	metabolic process	15566	388	381.98	0.02420	Mo	BP
GO:0071805	potassium ion transmembrane transport	56	4	1.37	0.04839	Mo	BP
GO:0006499	N-terminal protein myristoylation	2	1	0.05	0.04848	Mo	BP
GO:0009972	cytidine deamination	2	1	0.05	0.04848	Mo	BP
GO:0006546	glycine catabolic process	2	1	0.05	0.04848	Mo	BP
GO:0009439	cyanate metabolic process	2	1	0.05	0.04848	Mo	BP
GO:1902358	sulfate transmembrane transport	2	1	0.05	0.04848	Mo	BP
GO:0033179	proton-transporting V-type ATPase, V0 domain	9	2	0.08	0.0028	Na	CC
GO:0000178	exosome (RNase complex)	12	2	0.11	0.0050	Na	CC
GO:0005742	mitochondrial outer membrane translocase complex	3	1	0.03	0.0267	Na	CC
GO:0000786	nucleosome	77	3	0.69	0.0317	Na	CC
GO:0000124	SAGA complex	4	1	0.04	0.0355	Na	CC
GO:0008408	3'-5' exonuclease activity	64	5	0.57	0.00026	Na	MF
GO:0016705	oxidoreductase activity, acting on paired donors, with incorporation or reduction of molecular oxygen	697	16	6.19	0.00083	Na	MF
GO:0003883	CTP synthase activity	10	2	0.09	0.00337	Na	MF
GO:0016887	ATPase activity	478	10	4.25	0.00424	Na	MF
GO:0020037	heme binding	961	16	8.54	0.01241	Na	MF
GO:0031625	ubiquitin protein ligase binding	20	2	0.18	0.01344	Na	MF
GO:0004496	mevalonate kinase activity	2	1	0.02	0.01769	Na	MF
GO:0008381	mechanosensitive ion channel activity	2	1	0.02	0.01769	Na	MF
GO:0016788	hydrolase activity, acting on ester bonds	906	18	8.05	0.01817	Na	MF
GO:0015078	proton transmembrane transporter activity	182	7	1.62	0.02411	Na	MF
GO:0046961	proton-transporting ATPase activity, rotational mechanism	30	2	0.27	0.02903	Na	MF
GO:0030955	potassium ion binding	31	2	0.28	0.03085	Na	MF
GO:0004743	pyruvate kinase activity	31	2	0.28	0.03085	Na	MF
GO:0043565	sequence-specific DNA binding	570	10	5.06	0.03196	Na	MF
GO:0042586	peptide deformylase activity	4	1	0.04	0.03506	Na	MF
GO:0080123	jasmonate-amino synthetase activity	4	1	0.04	0.03506	Na	MF
GO:0004455	ketol-acid reductoisomerase activity	4	1	0.04	0.03506	Na	MF
GO:0004853	uroporphyrinogen decarboxylase activity	4	1	0.04	0.03506	Na	MF
GO:0008124	4-alpha-hydroxytetrahydrobiopterin dehydratase activity	4	1	0.04	0.03506	Na	MF
GO:0004748	ribonucleoside-diphosphate reductase activity, thioredoxin disulfide as acceptor	5	1	0.04	0.04363	Na	MF
GO:0050307	sucrose-phosphate phosphatase activity	5	1	0.04	0.04363	Na	MF
GO:0006139	nucleobase-containing compound metabolic process	4065	39	36.33	0.0001	Na	BP
GO:0015991	ATP hydrolysis coupled proton transport	57	4	0.51	0.0017	Na	BP
GO:0006541	glutamine metabolic process	27	2	0.24	0.0241	Na	BP
GO:0031047	gene silencing by RNA	28	2	0.25	0.0258	Na	BP
GO:0051382	kinetochore assembly	3	1	0.03	0.0266	Na	BP
GO:0055114	oxidation-reduction process	2527	32	22.58	0.0307	Na	BP
GO:0006221	pyrimidine nucleotide biosynthetic process	32	2	0.29	0.0331	Na	BP
GO:0009864	induced systemic resistance, jasmonic acid mediated signaling pathway	4	1	0.04	0.0353	Na	BP
GO:0009694	jasmonic acid metabolic process	4	1	0.04	0.0353	Na	BP
GO:0006729	tetrahydrobiopterin biosynthetic process	4	1	0.04	0.0353	Na	BP
GO:0006629	lipid metabolic process	783	11	7	0.0354	Na	BP
GO:0006897	endocytosis	5	1	0.04	0.0439	Na	BP
GO:0005986	sucrose biosynthetic process	5	1	0.04	0.0439	Na	BP
GO:0005874	microtubule	38	15	5.55	0.0003	P	CC
GO:0005634	nucleus	1267	204	184.94	0.0074	P	CC
GO:0033178	proton-transporting two-sector ATPase complex, catalytic domain	46	13	6.71	0.0204	P	CC
GO:0005839	proteasome core complex	45	10	6.57	0.0276	P	CC
GO:0005615	extracellular space	43	11	6.28	0.0407	P	CC
GO:0072546	ER membrane protein complex	6	3	0.88	0.0440	P	CC
GO:0005674	transcription factor TFIIF complex	6	3	0.88	0.0440	P	CC
GO:0003700	DNA-binding transcription factor activity	1054	188	145.78	0.00012	P	MF
GO:0003924	GTPase activity	86	25	11.89	0.00018	P	MF
GO:0003993	acid phosphatase activity	22	9	3.04	0.00166	P	MF
GO:0016844	strictosidine synthase activity	44	14	6.09	0.00178	P	MF
GO:0051536	iron-sulfur cluster binding	134	29	18.53	0.00346	P	MF
GO:0019825	oxygen binding	4	3	0.55	0.00948	P	MF
GO:0003697	single-stranded DNA binding	28	9	3.87	0.01061	P	MF
GO:0004396	hexokinase activity	15	6	2.07	0.01139	P	MF
GO:0005536	glucose binding	15	6	2.07	0.01139	P	MF
GO:0016758	transferase activity, transferring hexosyl groups	892	145	123.37	0.01395	P	MF
GO:0003690	double-stranded DNA binding	112	21	15.49	0.01596	P	MF
GO:0004144	diacylglycerol O-acyltransferase activity	8	4	1.11	0.01607	P	MF
GO:0005086	ARF guanyl-nucleotide exchange factor activity	16	6	2.21	0.01613	P	MF
GO:0016151	nickel cation binding	12	5	1.66	0.01717	P	MF
GO:0003677	DNA binding	2415	408	334.02	0.01873	P	MF
GO:0000049	tRNA binding	17	6	2.35	0.02207	P	MF
GO:0000155	phosphorelay sensor kinase activity	22	7	3.04	0.02465	P	MF
GO:0016788	hydrolase activity, acting on ester bonds	906	140	125.31	0.02760	P	MF
GO:0016149	translation release factor activity, codon specific	18	6	2.49	0.02932	P	MF
GO:0005543	phospholipid binding	72	14	9.96	0.03178	P	MF
GO:0003779	actin binding	49	11	6.78	0.03589	P	MF
GO:0004334	fumarylacetoacetase activity	6	3	0.83	0.03818	P	MF
GO:0004452	isopentenyl-diphosphate delta-isomerase activity	6	3	0.83	0.03818	P	MF
GO:0046961	proton-transporting ATPase activity, rotational mechanism	30	8	4.15	0.04662	P	MF
GO:0005525	GTP binding	351	60	48.55	0.04712	P	MF
GO:0007017	microtubule-based process	225	44	31.49	0.00068	P	BP
GO:0006605	protein targeting	67	13	9.38	0.00207	P	BP
GO:0048544	recognition of pollen	189	41	26.45	0.00252	P	BP
GO:0045017	glycerolipid biosynthetic process	41	8	5.74	0.00942	P	BP
GO:0046835	carbohydrate phosphorylation	15	6	2.1	0.01206	P	BP
GO:0001678	cellular glucose homeostasis	15	6	2.1	0.01206	P	BP
GO:0032012	regulation of ARF protein signal transduction	16	6	2.24	0.01705	P	BP
GO:0051603	proteolysis involved in cellular protein catabolic process	207	33	28.97	0.02193	P	BP
GO:0009058	biosynthetic process	4927	780	689.61	0.02391	P	BP
GO:0016049	cell growth	22	7	3.08	0.02614	P	BP
GO:0009072	aromatic amino acid family metabolic process	99	16	13.86	0.02687	P	BP
GO:0009765	photosynthesis, light harvesting	32	9	4.48	0.02769	P	BP
GO:0007010	cytoskeleton organization	154	30	21.55	0.03289	P	BP
GO:0009245	lipid A biosynthetic process	6	3	0.84	0.03940	P	BP
GO:0006353	DNA-templated transcription, termination	6	3	0.84	0.03940	P	BP
GO:0006334	nucleosome assembly	34	9	4.76	0.04008	P	BP
GO:0006096	glycolytic process	103	21	14.42	0.04673	P	BP
GO:0007165	signal transduction	426	72	59.62	0.04955	P	BP
GO:0005576	extracellular region	144	13	7.55	0.00059	Rb	CC
GO:0000145	exocyst	97	11	5.08	0.01219	Rb	CC
GO:0005956	protein kinase CK2 complex	4	2	0.21	0.01531	Rb	CC
GO:0043531	ADP binding	788	67	42.65	0.00018	Rb	MF
GO:0004451	isocitrate lyase activity	8	4	0.43	0.00050	Rb	MF
GO:0005515	protein binding	5578	344	301.92	0.00057	Rb	MF
GO:0004553	hydrolase activity, hydrolyzing O-glycosyl compounds	725	64	39.24	0.00207	Rb	MF
GO:0030170	pyridoxal phosphate binding	159	18	8.61	0.00248	Rb	MF
GO:0045300	acyl-[acyl-carrier-protein] desaturase activity	19	5	1.03	0.00284	Rb	MF
GO:0052725	inositol-1,3,4-trisphosphate 6-kinase activity	12	4	0.65	0.00298	Rb	MF
GO:0052726	inositol-1,3,4-trisphosphate 5-kinase activity	12	4	0.65	0.00298	Rb	MF
GO:0047325	inositol tetrakisphosphate 1-kinase activity	12	4	0.65	0.00298	Rb	MF
GO:0000155	phosphorelay sensor kinase activity	22	5	1.19	0.00561	Rb	MF
GO:0008081	phosphoric diester hydrolase activity	44	6	2.38	0.00686	Rb	MF
GO:0047746	chlorophyllase activity	3	2	0.16	0.00847	Rb	MF
GO:0071949	FAD binding	37	6	2	0.01368	Rb	MF
GO:0004371	glycerone kinase activity	4	2	0.22	0.01633	Rb	MF
GO:0003924	GTPase activity	86	10	4.65	0.01767	Rb	MF
GO:0004550	nucleoside diphosphate kinase activity	11	3	0.6	0.01882	Rb	MF
GO:0005215	transporter activity	1496	87	80.97	0.02316	Rb	MF
GO:0004664	prephenate dehydratase activity	12	3	0.65	0.02410	Rb	MF
GO:0010181	FMN binding	44	6	2.38	0.03023	Rb	MF
GO:0004852	uroporphyrinogen-III synthase activity	6	2	0.32	0.03796	Rb	MF
GO:0004568	chitinase activity	37	5	2	0.04776	Rb	MF
GO:0005975	carbohydrate metabolic process	1078	79	57.86	0.0004	Rb	BP
GO:0032957	inositol trisphosphate metabolic process	12	4	0.64	0.0029	Rb	BP
GO:0006904	vesicle docking involved in exocytosis	22	5	1.18	0.0054	Rb	BP
GO:0015996	chlorophyll catabolic process	3	2	0.16	0.0083	Rb	BP
GO:0006631	fatty acid metabolic process	212	15	11.38	0.0101	Rb	BP
GO:0006071	glycerol metabolic process	4	2	0.21	0.0161	Rb	BP
GO:0009059	macromolecule biosynthetic process	3733	183	200.36	0.0168	Rb	BP
GO:0006183	GTP biosynthetic process	11	3	0.59	0.0184	Rb	BP
GO:0006228	UTP biosynthetic process	11	3	0.59	0.0184	Rb	BP
GO:0006241	CTP biosynthetic process	11	3	0.59	0.0184	Rb	BP
GO:0006165	nucleoside diphosphate phosphorylation	114	8	6.12	0.0184	Rb	BP
GO:0016998	cell wall macromolecule catabolic process	41	6	2.2	0.0212	Rb	BP
GO:0009094	L-phenylalanine biosynthetic process	12	3	0.64	0.0236	Rb	BP
GO:0019538	protein metabolic process	5637	304	302.56	0.0236	Rb	BP
GO:0032968	positive regulation of transcription elongation from RNA polymerase II promoter	5	2	0.27	0.0258	Rb	BP
GO:0019752	carboxylic acid metabolic process	837	51	44.92	0.0263	Rb	BP
GO:0007094	mitotic spindle assembly checkpoint	13	3	0.7	0.0294	Rb	BP
GO:0015743	malate transport	24	4	1.29	0.0372	Rb	BP
GO:0006269	DNA replication, synthesis of RNA primer	6	2	0.32	0.0374	Rb	BP
GO:0006032	chitin catabolic process	37	5	1.99	0.0463	Rb	BP
GO:0006887	exocytosis	111	14	5.96	0.0482	Rb	BP
GO:0005634	nucleus	1267	100	72.27	0.00067	Sr	CC
GO:0005730	nucleolus	11	3	0.63	0.02156	Sr	CC
GO:0045735	nutrient reservoir activity	84	45	5.39	< 1e-30	Sr	MF
GO:0010333	terpene synthase activity	114	17	7.31	0.00095	Sr	MF
GO:0047750	cholestenol delta-isomerase activity	5	3	0.32	0.00239	Sr	MF
GO:0043531	ADP binding	788	71	50.54	0.00245	Sr	MF
GO:0005507	copper ion binding	128	17	8.21	0.00340	Sr	MF
GO:0008677	2-dehydropantoate 2-reductase activity	2	2	0.13	0.00411	Sr	MF
GO:0004672	protein kinase activity	2724	204	174.7	0.00886	Sr	MF
GO:0004045	aminoacyl-tRNA hydrolase activity	14	4	0.9	0.01004	Sr	MF
GO:0008061	chitin binding	30	6	1.92	0.01082	Sr	MF
GO:0004124	cysteine synthase activity	3	2	0.19	0.01181	Sr	MF
GO:0050017	L-3-cyanoalanine synthase activity	3	2	0.19	0.01181	Sr	MF
GO:0046872	metal ion binding	3541	222	227.1	0.01614	Sr	MF
GO:0008171	O-methyltransferase activity	83	11	5.32	0.02491	Sr	MF
GO:0030247	polysaccharide binding	207	21	13.28	0.02540	Sr	MF
GO:0009916	alternative oxidase activity	11	3	0.71	0.02945	Sr	MF
GO:0000287	magnesium ion binding	237	23	15.2	0.03152	Sr	MF
GO:0003871	5-methyltetrahydropteroyltriglutamate-homocysteine S-methyltransferase activity	5	2	0.32	0.03609	Sr	MF
GO:0006308	DNA catabolic process	19	6	1.18	0.00075	Sr	BP
GO:0045132	meiotic chromosome segregation	4	3	0.25	0.00090	Sr	BP
GO:0006468	protein phosphorylation	2726	206	168.61	0.00096	Sr	BP
GO:0030001	metal ion transport	291	31	18	0.00209	Sr	BP
GO:0016125	sterol metabolic process	5	3	0.31	0.00215	Sr	BP
GO:0018279	protein N-linked glycosylation via asparagine	2	2	0.12	0.00382	Sr	BP
GO:0019499	cyanide metabolic process	3	2	0.19	0.01100	Sr	BP
GO:0048544	recognition of pollen	189	20	11.69	0.01335	Sr	BP
GO:0008152	metabolic process	15566	963	962.8	0.02001	Sr	BP
GO:0006364	rRNA processing	49	7	3.03	0.03008	Sr	BP
GO:0006099	tricarboxylic acid cycle	20	4	1.24	0.03186	Sr	BP
GO:0032968	positive regulation of transcription elongation from RNA polymerase II promoter	5	2	0.31	0.03372	Sr	BP
GO:0019538	protein metabolic process	5637	361	348.67	0.03834	Sr	BP
GO:0006890	retrograde vesicle-mediated transport, Golgi to ER	13	3	0.8	0.04234	Sr	BP
GO:0003333	amino acid transmembrane transport	77	9	4.76	0.04763	Sr	BP
GO:0006672	ceramide metabolic process	6	2	0.37	0.04853	Sr	BP
GO:0006434	seryl-tRNA aminoacylation	6	2	0.37	0.04853	Sr	BP
GO:0005789	endoplasmic reticulum membrane	96	8	3.71	0.046	Zn	CC
GO:0016992	lipoate synthase activity	11	4	0.39	0.00042	Zn	MF
GO:0051539	4 iron, 4 sulfur cluster binding	21	4	0.74	0.00580	Zn	MF
GO:0009916	alternative oxidase activity	11	3	0.39	0.00592	Zn	MF
GO:0003700	DNA-binding transcription factor activity	1054	53	37.37	0.00706	Zn	MF
GO:0047617	acyl-CoA hydrolase activity	4	2	0.14	0.00718	Zn	MF
GO:0004568	chitinase activity	37	5	1.31	0.00943	Zn	MF
GO:0042393	histone binding	67	7	2.38	0.00946	Zn	MF
GO:0004540	ribonuclease activity	58	4	2.06	0.00975	Zn	MF
GO:0004045	aminoacyl-tRNA hydrolase activity	14	3	0.5	0.01207	Zn	MF
GO:0018024	histone-lysine N-methyltransferase activity	42	5	1.49	0.01593	Zn	MF
GO:0046872	metal ion binding	3541	118	125.55	0.01882	Zn	MF
GO:0008171	O-methyltransferase activity	83	9	2.94	0.01918	Zn	MF
GO:0008113	peptide-methionine (S)-S-oxide reductase activity	7	2	0.25	0.02342	Zn	MF
GO:0004425	indole-3-glycerol-phosphate synthase activity	7	2	0.25	0.02342	Zn	MF
GO:0042626	ATPase activity, coupled to transmembrane movement of substances	157	10	5.57	0.02719	Zn	MF
GO:0043565	sequence-specific DNA binding	570	30	20.21	0.03182	Zn	MF
GO:0043047	single-stranded telomeric DNA binding	1	1	0.04	0.03546	Zn	MF
GO:0070008	serine-type exopeptidase activity	120	4	4.25	0.03845	Zn	MF
GO:0004367	glycerol-3-phosphate dehydrogenase [NAD+] activity	10	2	0.35	0.04679	Zn	MF
GO:0008242	omega peptidase activity	10	2	0.35	0.04679	Zn	MF
GO:0017025	TBP-class protein binding	10	2	0.35	0.04679	Zn	MF
GO:0009107	lipoate biosynthetic process	11	4	0.43	0.00062	Zn	BP
GO:0016998	cell wall macromolecule catabolic process	41	6	1.61	0.00495	Zn	BP
GO:0030001	metal ion transport	291	20	11.4	0.00759	Zn	BP
GO:0006379	mRNA cleavage	4	2	0.16	0.00873	Zn	BP
GO:0006032	chitin catabolic process	37	5	1.45	0.01406	Zn	BP
GO:0008152	metabolic process	15566	599	609.91	0.01416	Zn	BP
GO:0034968	histone lysine methylation	38	5	1.49	0.01569	Zn	BP
GO:0055085	transmembrane transport	1286	61	50.39	0.01727	Zn	BP
GO:0006952	defense response	91	8	3.57	0.02627	Zn	BP
GO:0006637	acyl-CoA metabolic process	8	2	0.31	0.03669	Zn	BP
GO:0051260	protein homooligomerization	8	2	0.31	0.03669	Zn	BP
GO:0006364	rRNA processing	49	5	1.92	0.04207	Zn	BP
GO:0006334	nucleosome assembly	34	4	1.33	0.04276	Zn	BP
